# Supplementary material for: Breaking the Third Wall: Implementing 3D-Printing Techniques to Expand the Complexity and Abilities of Multi-Organ-on-a-Chip Devices
Source: MDPI journal article supplement (doi:10.3390/mi12060627), 2021-05-28
Supplement: s1 [file s1]

**Supplementary Information for “Breaking the 3rd wall:  
implementing 3D printing technics to expand the complexity and  
abilities of multi-organ-on-a-chip devices”**

**Table S1. 3D printing characteristics compared with common microfluidic based methods**

| <b>Method</b>            | <b>Approach</b>           | <b>Polymer</b>                       | <b>transparency</b> | <b>Biocompatible</b> | <b>Permeable</b> | <b>Architecture</b> | <b>Cost</b> |
|--------------------------|---------------------------|--------------------------------------|---------------------|----------------------|------------------|---------------------|-------------|
| <b>Soft lithography</b>  | Template                  | PDMS                                 | High                | Yes                  | Yes              | 2D                  | Moderate    |
| <b>E-beam</b>            | Template                  | PDMS                                 | High                | Yes                  | Yes              | 2D                  | High        |
| <b>Hot embossing</b>     | Template                  | PMMA<br>PC<br>COC                    | High                | Yes                  | No               | Semi-2D             | High        |
| <b>DLP – 3D printing</b> | Whole device              | PEGDA                                | moderate            | Yes                  | Yes              | 3D                  | Low         |
|                          | Template/<br>whole device | Detax<br>Luxaprint<br>Mould<br>Clear | moderate            | NA                   | No               | 3D                  | Low         |
| <b>Laser</b>             | Whole device              | Glass                                | High                | Yes                  | No               | 3D                  | High        |

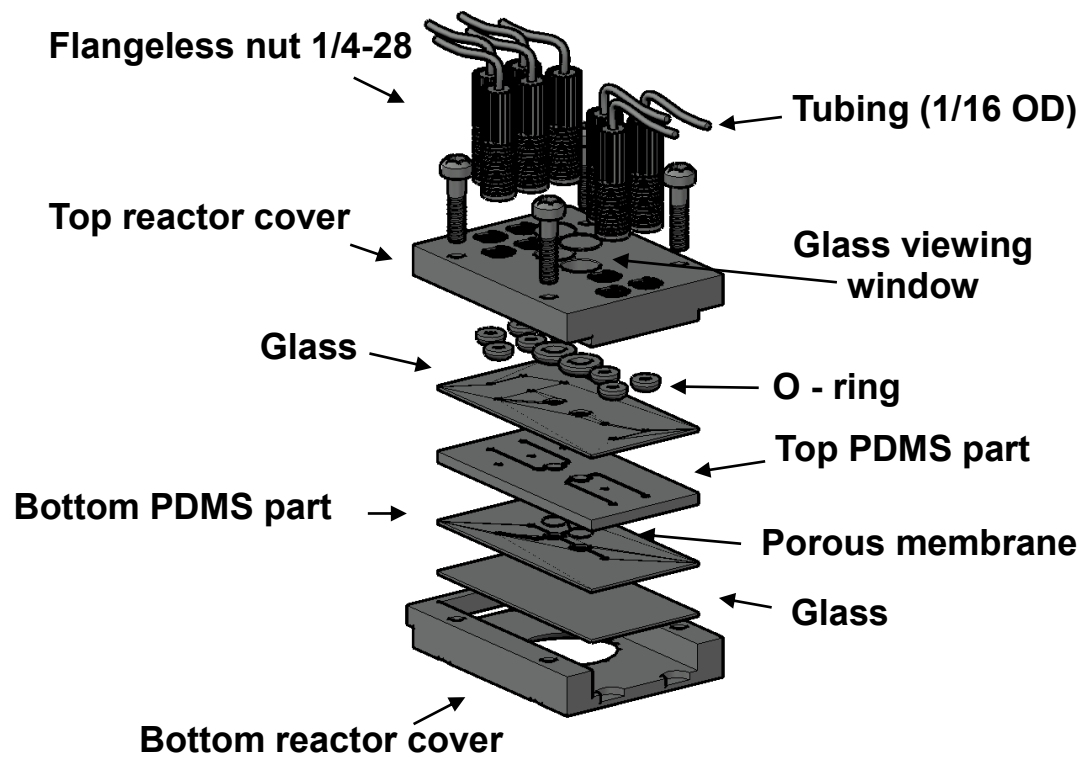

**Fig. S.1.** Explosive view of a theoretical multi-organ microfluidic device.

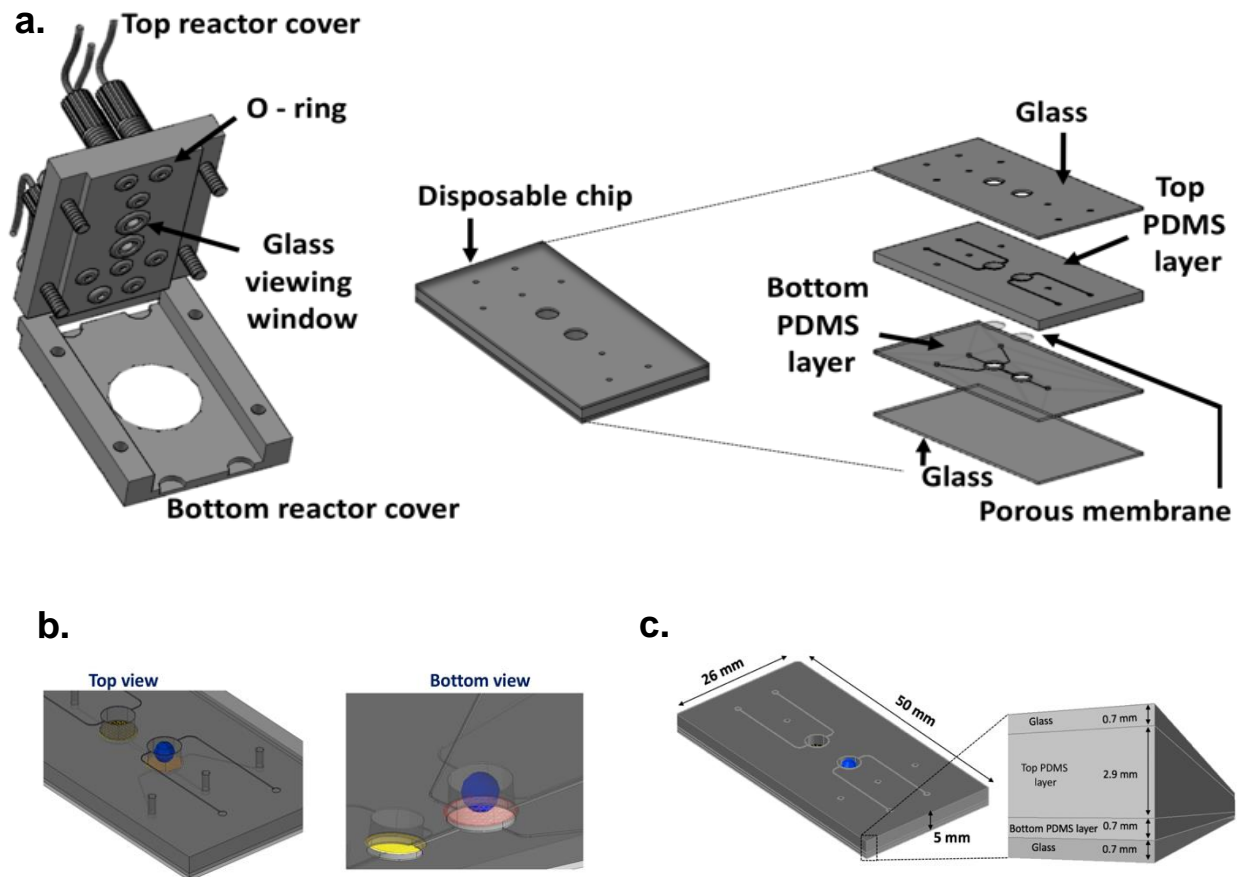

**Fig. S.2. Illustration of the microfluidic platform.** **a.** The chip is composed of a fixed (external) and disposable (internal) units. In such a design the fixed unit is 3D printed while the disposable unit is made of PDMS-casted on 3D printed templates. **b.** The system supports cell seeding (monolayer/organoids) in an open configuration within the disposable unit and perfusion via the external unit. Each well has its own inflow/outflow while interaction between the wells is done via the bottom connecting channel. **c.** Illustration of the disposable unit layers and dimensions.

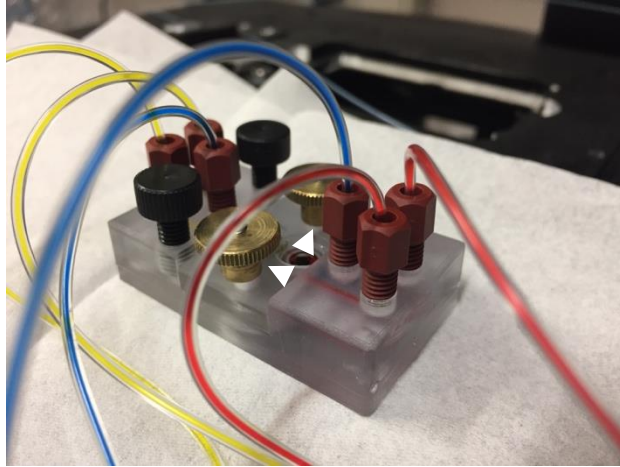

**Fig. S.3. A top view of the assembled whole 3D-printed MOC.** The assembled of the MOC was done by using screws (white arrowheads). Red, blue and yellow colors were used to demonstrate discrete perfusion through flangeless nuts 1/4-28 (red connectors), while plugs (black connectors) were used to block flow in specific ports.

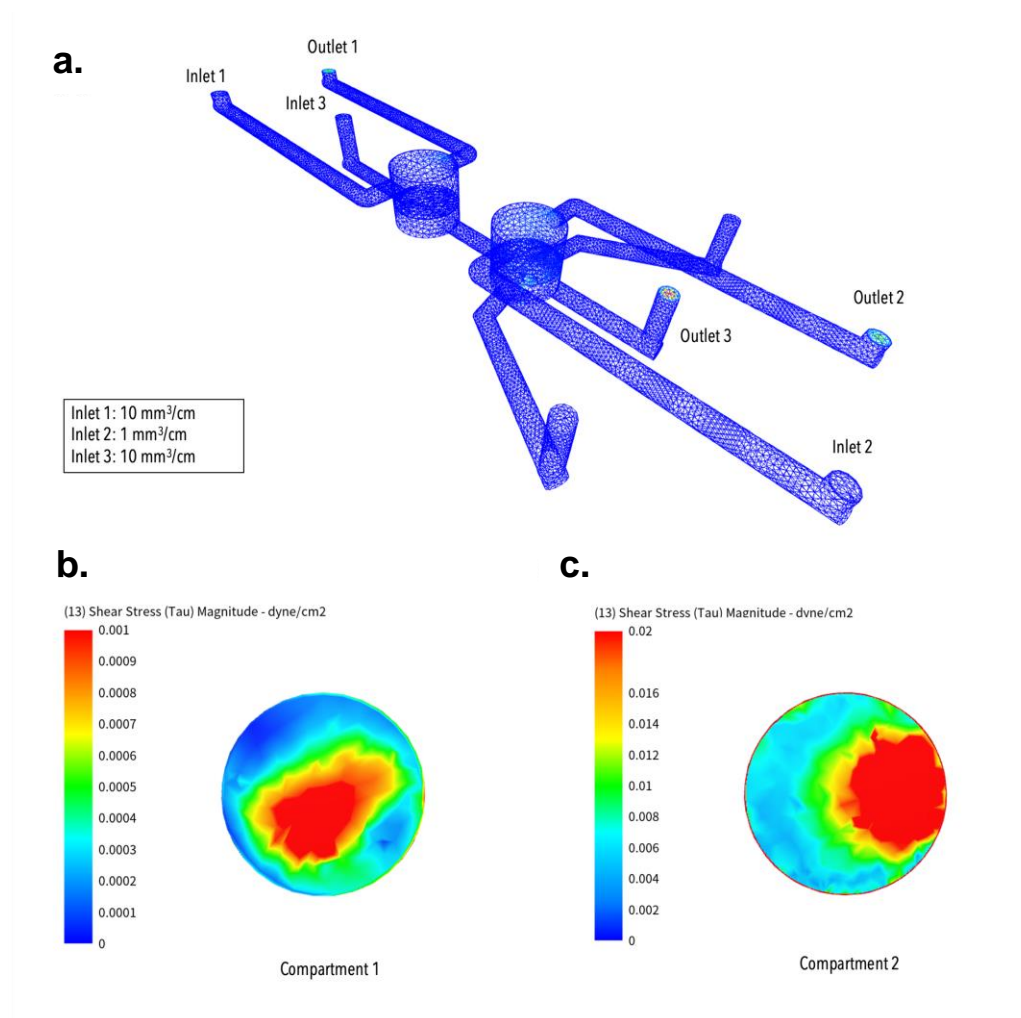

**Fig. S.4. Shear stress simulation on the membrane surface** **a.** Overview of the microfluidic device depicting its fluidic connections as well as the control volumes generated with the automatic mesh generator. **b.** Shear stress distribution at the surface of the integrated PET membrane in compartment 1. **c.** Shear stress distribution at the surface of the integrated PET membrane in compartment 2.

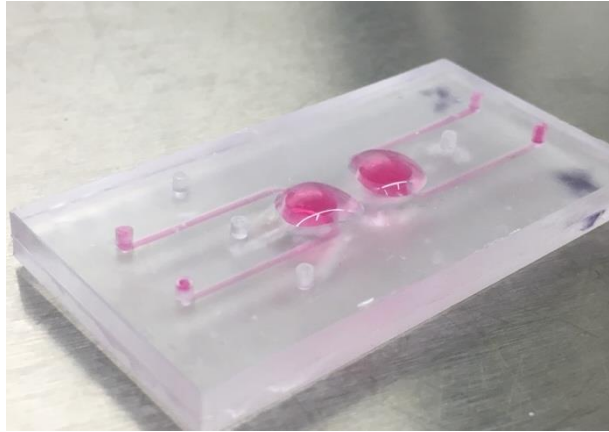

**Fig. S.5. 3D-printed unit used to evaluate cell biocompatibility and toxicity.** In order to simplify the validation of the effect of the 3D-printing resin on cells, we 3D-printed the upper unit of the MOC without the nuts and cover. A porous membrane was placed between the top and bottom units which then were bonded together.

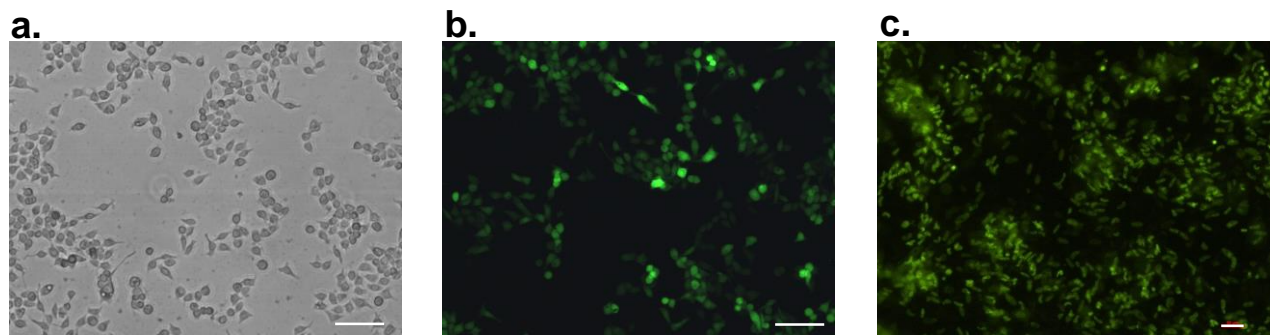

**Fig. S.6. Fluoresce Visualization of viable GFP-PC9 cells.** **a.** Bright field and GFP visualization of viable GFP-PC9 cells **b.** cultured on plate and **c.** when introduced into the device and cultured on PET membrane with standard fluoresce microscopy. scale bar = 50  $\mu\text{m}$
